# Supplementary material
Source: PubMed Central journal article supplement (PMC6976097)
Supplement: 41997_2004_BF03403997_MOESM1_ESM.pdf [file 41997_2004_BF03403997_MOESM1_ESM.pdf]

# Trente ans de marketing et de communications efficaces

Peggy Edwards

**D**urant 30 ans, ParticipACTION a fait la promotion de l'activité physique, réalisant probablement ainsi un record mondial ! Durant 30 ans, l'organisme a encouragé les Canadiens de tous âges et de toutes tailles à intégrer l'activité physique à leur quotidien. Malgré un personnel et un budget modestes, ParticipACTION a réussi à devenir une source d'influence, de notoriété et de fierté unique au pays. L'histoire de ce succès est importante, aussi bien pour les praticiens, les spécialistes du marketing et les planificateurs des secteurs des communications, de la santé publique et de la promotion de la santé. Cet article retrace le parcours de ParticipACTION d'un point de vue marketing, le situant dans son contexte historique. Les autres articles de ce supplément traitent du rôle de certains acteurs clés, des activités de mobilisation et d'éducation populaires, de l'évaluation, du défi des communications bilingues et des leçons tirées de toute cette aventure.

## Un modèle de marketing social ou de communications sur la santé ?

Et pourquoi pas un modèle des deux ? Comme le suggère le titre de ce supplément, *ParticipACTION : faire bouger les choses et les gens. Un succès de marketing et de communications*, la nature même de l'organisme et son évolution l'ont incité à jouer sur les deux plans et à faire preuve d'audace en empruntant des techniques aux deux camps. Dans leur article intitulé « ParticipACTION a-t-il eu les effets visés ? », Bauman, Madill, Craig et Salmon<sup>1</sup> explorent l'aspect théorique de cette évolution, de même que les retombées de son action.

Au moment de la création de ParticipACTION, en 1971, la notion de « communications sur la santé » n'existait pas. L'apparition du concept de santé publique avait bien sûr donné lieu à des efforts pour inciter les gens à vivre sainement, mais, au cours des années 1950 et 1960, ils consistaient essentiellement à faire de « l'éducation socio-sanitaire ». Cette éducation se résumait à des communications unidirectionnelles destinées à renseigner la population plutôt qu'à l'inciter à agir. Aujourd'hui, le *Health Communication Unit* du *Centre for Health Promotion* de l'Université de Toronto définit une campagne de communication sur la santé comme étant :

« ...des efforts ciblés pour informer, persuader ou motiver des changements personnels et sociaux à l'échelle individuelle, organisationnelle et sociétale. Ces efforts s'adressent à un public large, mais bien défini, et peuvent s'étendre sur des périodes allant de quelques semaines à plusieurs années. Ils englobent des activités de communication structurées qui peuvent s'inspirer de techniques de marketing social, de plaidoyer dans les médias et de mobilisation communautaire. »<sup>2</sup>

En 1971, le concept de marketing social faisait lui aussi à peine son apparition dans les articles spécialisés<sup>3</sup> et n'était pas pratique courante. ParticipACTION a donc largement contribué à l'avancement du marketing social et des communications sur la santé, tant par nécessité que par conviction.

Les communications sur la santé et le marketing social permettent d'augmenter la notoriété et la connaissance d'un sujet et d'influencer les comportements et les perceptions. L'efficacité de ces stratégies atteint un niveau optimal si elles sont combinées à des interventions locales.<sup>4</sup> Au fil des articles qui suivent, on constatera que ParticipACTION a eu recours à une combinaison unique de techniques de sensibilisation, d'éducation et de motivation :

- diffusion de messages grand public, par le biais d'un large éventail de médias ;
- techniques marketing diverses : image de marque, promotion, positionnement et publicité sur les lieux de vente ;
- programmes d'information et de motivation diffusés par le biais d'intermédiaires ;
- partenariats et réseautage ;
- mobilisation communautaire et événements locaux ; et
- influence interpersonnelle et leadership.

Pour bien comprendre le rôle de chacun de ces éléments, il est important de préciser le contexte historique et la séquence des événements, de même que les raisons qui ont motivé certaines des grandes décisions. (Voir en annexe la liste des étapes clés de 1971 à 2000.) Cela dit, il m'a été difficile de rendre justice à cette histoire si riche en un seul article. J'ai été sidérée par la quantité et l'originalité des produits, messages et activités contenus dans les archives de ParticipACTION ! Cet article d'ouverture mettra principalement en lumière les messages d'intérêt public et l'expérience marketing de ParticipACTION. Les articles qui suivent exploreront d'autres éléments.

## Les premières années

À la fin des années 1960, les dirigeants canadiens ont commencé à se préoccuper de la dégradation généralisée de l'état de santé et de la forme physique, de l'augmentation des maladies cardiovasculaires et de la hausse rapide des coûts des soins de santé. Peu auparavant, le prince Philip, en visite au Canada, avait soulevé le problème de la sédentarité au pays, un mode de vie qui préparait mal la population canadienne à intervenir en cas d'urgence. Cette semonce a mené à l'adoption de la Loi C-131 – *Loi sur la santé et le sport amateur*, et à la création de Sport Canada et de Récréation Canada (rebaptisé Condition physique Canada en 1980). Au cours des années 1970, on a multiplié les conférences nationales sur la santé et la condition physique, notamment en milieu de travail ; des millions d'écoliers ont décroché leur prix Jeunesse en forme Canada ; et on a mené la première Enquête sur la condition physique au Canada.

En 1974, la publication du document *Nouvelle perspective de la santé des Canadiens*<sup>5</sup> a été le prélude à un nouveau

Peggy Edwards, aujourd'hui experte-conseil en promotion de la santé auprès de The Alder Group Inc., a occupé les fonctions de rédactrice en chef à ParticipACTION. Elle a également été membre de la direction des communications à Santé Canada et directrice du secrétariat de la condition physique à l'Association canadienne de santé publique.

**Toute la vérité sur le Suédois de 60 ans**

Au début de l'automne 1972, Russ Kisby a fait lire à Keith McKerracher un livre dans lequel le Dr Roy Shephard expliquait qu'un homme actif de 60 ans pouvait présenter la même forme physique qu'un homme sédentaire de 30 ans. Sur la même page, un tableau comparatif du niveau de forme physique dans différents pays situait la Suède en tête et le Canada parmi les derniers. À partir de ces données, McKerracher a créé une annonce télévisée d'intérêt public de 15 secondes dans laquelle on voyait un Suédois de 60 ans joggant avec facilité à côté d'un Canadien de 30 ans en nage.

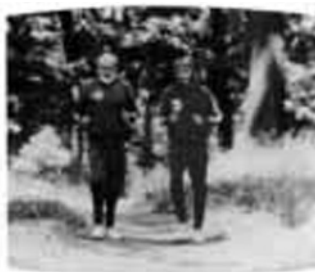

CANADIEN VS. SUÉDOIS  
1973

Une voix hors-champ disait : « Ces hommes sont à peu près de force égale. En effet, le Canadien moyen de 30 ans est à peu près aussi en forme que le Suédois moyen de 60 ans. Courez. Marchez. Faites du vélo. Les Canadiens doivent recommencer à bouger. » L'annonce n'a été diffusée que six fois en 1973 durant des matchs de la Ligue canadienne de football. Pourtant, son impact a été immédiat et a même suscité un débat au Parlement. La population était inquiète et honteuse. L'annonce a si bien réussi à démontrer la piètre forme physique au Canada qu'elle est devenue la pierre d'assise d'un nouveau mouvement. Le vieux Suédois de 60 ans s'est révélé un concept percutant qui a influencé les normes sociales, à court terme en suscitant un débat public et à long terme puisque des gens s'en souviennent encore des décennies plus tard.

«...Depuis 1972, nous nous occupons d'une question d'importance vitale pour tous les Canadiens. Notre objectif est ambitieux: changer fondamentalement la qualité de la vie dans notre pays.»

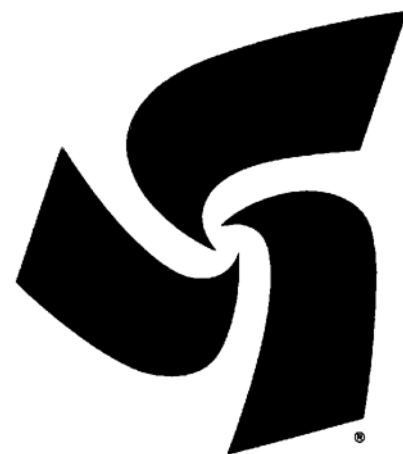

**ON PARLE  
D'ACTION**

**LE CANADA  
EST UN PAYS  
SOUS - DEVELOPPE.**

Marchez, courez, nagez, pédalez, skiez,  
faites ce que vous voulez mais participez.

concept de promotion de la santé au Canada et ailleurs dans le monde. Ce document marquant invitait les associations sportives, les employeurs, les syndicats, les municipalités et les mouvements de femmes à promouvoir et à favoriser l'activité physique pour tous. Grâce à ses campagnes de publicité et à ses activités spéciales, ParticipACTION a su assurer le leadership de ce vaste mouvement national en émergence.

*La naissance d'une idée*

En 1969, une étude commandée par le Conseil consultatif national de la Condition physique et du Sport amateur a conclu que les Canadiens affichaient une forme physique si pitoyable qu'elle menaçait leur avenir, une situation qui semblait laisser la population totalement

indifférente. Devant ce constat, Philippe de Gaspé Beaubien, alors président de ce conseil consultatif, a réclamé au premier ministre Pierre Trudeau et aux hauts fonctionnaires fédéraux les fonds nécessaires pour créer un organisme de promotion de l'activité physique indépendant qui serait par la suite financé à la fois par les secteurs public et privé.

La nouvelle structure nationale sans but lucratif, appelée à l'origine « Sport Participation Canada », a tenu sa première réunion officielle en septembre 1971. Son premier directeur, M. Keith McKerracher, un expert-conseil en marketing réputé, a été engagé sur recommandation d'une agence de recrutement de cadres. La petite annonce se lisait ainsi : « Recherché : un directeur général pour faire bouger la population canadienne. La récompense :

un salaire généreux et les remerciements des générations futures. » McKerracher avoue qu'il ne connaissait rien à l'activité physique (certains professionnels accusèrent d'ailleurs le gouvernement d'avoir choisi un « vendeur ») ; en revanche, il savait comment fonctionnait le marketing.

McKerracher a ouvert un bureau à Montréal et a embauché Jacques Gravel, un francophone issu lui aussi du milieu de la publicité et du marketing, et Russ Kisby, doté d'une solide expérience du secteur de l'éducation physique et des loisirs. Il a ensuite formé un conseil d'administration composé de personnalités en vue, notamment le très honorable Lester B. Pearson, qui a présidé le conseil de 1971 à 1972 (voir l'article « Une différence inspirée par des gens différents » qui porte

sur les hommes qui ont donné vie au concept).

La mission de l'organisme comportait deux volets : inciter l'ensemble de la population canadienne à être plus active et, à long terme, améliorer la condition physique moyenne. Si l'objectif rejoignait celui de plusieurs autres organismes, sa volonté de « vendre » sa mission à l'aide de techniques et d'outils de marketing commercial la distinguait. McKerracher était déterminé à créer une image publicitaire qui serait aussi connue au pays que le symbole de la laine canadienne. « Le symbole de la laine conférait une image de chaleur, de durabilité et d'apparence ; le nôtre sous-entendrait l'activité, la santé et l'importance pour chacun de bouger », déclarait-il.

L'un des premiers plans stratégiques de ParticipACTION décrivait d'ailleurs ainsi la mission et l'orientation principales de l'organisme :

*« ...le développement et le maintien d'une importante campagne d'envergure nationale pour motiver l'ensemble des Canadiens et Canadiennes à devenir plus actifs. Pour ce faire, nous aurons recours à des techniques de communication et de persuasion modernes, visant à sensibiliser la population à l'importance de la condition physique. Nous tenterons aussi de faire de l'activité et de la forme physique une norme sociale mieux acceptée. »*

La dernière phrase de ce texte est particulièrement importante, puisqu'elle traite du changement de normes sociales, un objectif à long terme qui se révèle aujourd'hui être le fondement même du marketing social et des communications sur la santé.

Dans les premiers temps, il était souvent question du double mandat de ParticipACTION : inciter les gens à se maintenir en forme, mais aussi contribuer à bâtir une nation en forme. L'équipe a décidé que la meilleure façon d'atténuer la perception que, pour être en forme il fallait souffrir et suer, était d'utiliser l'humour. C'est ainsi que les gens ont eu la surprise de voir dans les autobus des affiches les invitant à « jogger jusqu'au fond de l'autobus car ce serait probablement leur seul exercice de la journée » ou qui les interpellait d'un « Occupez-vous de ce qui vous regarde...

### Le mix marketing de ParticipACTION

|                         |                                                                                                                                                                                                                                                                                                                                                                                                                                                                                                                                                                                         |
|-------------------------|-----------------------------------------------------------------------------------------------------------------------------------------------------------------------------------------------------------------------------------------------------------------------------------------------------------------------------------------------------------------------------------------------------------------------------------------------------------------------------------------------------------------------------------------------------------------------------------------|
| <b>Produit :</b>        | Un mode de vie sain et actif ; un pays en forme.                                                                                                                                                                                                                                                                                                                                                                                                                                                                                                                                        |
| <b>Place :</b>          | Se tenir en forme à la maison, à l'école, au travail, en se déplaçant, en jouant dehors, dans le quartier.                                                                                                                                                                                                                                                                                                                                                                                                                                                                              |
| <b>Prix :</b>           | Être actif, c'est simple, amusant, accessible et abordable. C'est bon pour la santé, l'apparence et le bien-être.                                                                                                                                                                                                                                                                                                                                                                                                                                                                       |
| <b>Promotion :</b>      | Publicité d'intérêt public, relations publiques, communications individuelles, événements communautaires, ressources éducatives. Les réseaux de diffusion comprenaient les médias (de masse et ciblés), les communications des commanditaires, l'Internet, les milieux de travail, les écoles, les universités, les municipalités, les événements, la PLV dans les supermarchés et les pharmacies, les installations récréatives, sportives et d'exercice, le matériel éducatif (films, affiches, etc.), les professionnels de la santé, les diététistes et les leaders communautaires. |
| <b>Positionnement :</b> | Le mouvement canadien du bien-être physique.                                                                                                                                                                                                                                                                                                                                                                                                                                                                                                                                            |

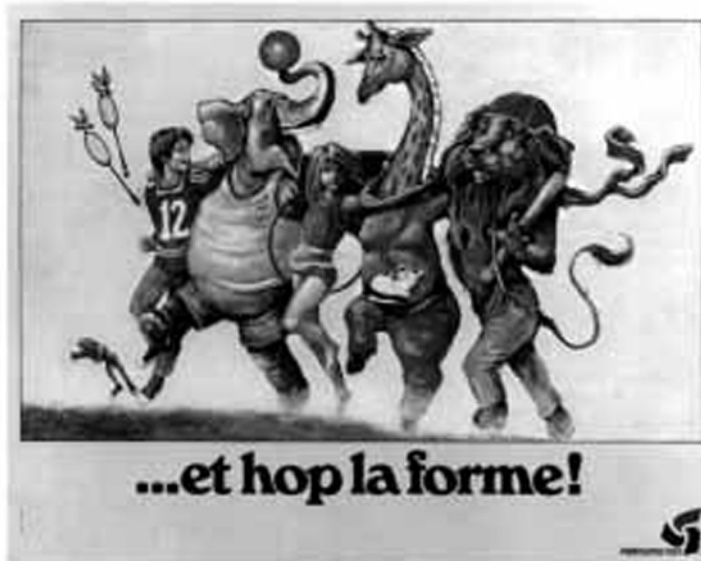

gardez-vous en forme ! ». Dans certaines villes, le personnel a fait la joie de nombreux citoyens en arrêtant leur maire pour cause de mauvaise condition physique...

#### L'image de marque d'un concept

La plupart des organismes et entreprises dépensent des millions, voire des milliards, de dollars pour assurer la notoriété de leur marque. Pourtant, avec un budget et un personnel modestes, ParticipACTION a réussi à atteindre la notoriété des plus grands. Comme le rappelle Bauman et al. dans leur article, la notoriété de ParticipACTION et de ses messages a presque toujours été supérieure à 80 %, même après que l'agence eut cessé de créer de nouvelles annonces en 1999.<sup>1</sup> Et la chance n'y était pour rien. En tant qu'agence marketing, ParticipACTION

avait compris que l'attrait de la marque était aussi important que le message.

Dans son article « Le défi du bilinguisme », Lagarde<sup>6</sup> explique la conception du nom ParticipACTION. Le choix d'un mot nouveau dont personne n'avait entendu parler était tout à fait délibéré. « Nous avons jonglé avec des noms tels que *Sport Participation* et même *Condition physique Canada*, de confier Kisby, mais tous nos groupes de discussion tendaient à démontrer que les gens associaient les mots « condition physique » et « exercice » à des idées d'effort et de désagrément, le mot « sport » à la performance d'élite et le mot « Canada » à un organisme gouvernemental. Nous avons donc choisi un nom qui n'était teinté d'aucune connotation, au risque de nous heurter à la difficulté de faire accepter un nouveau mot. »

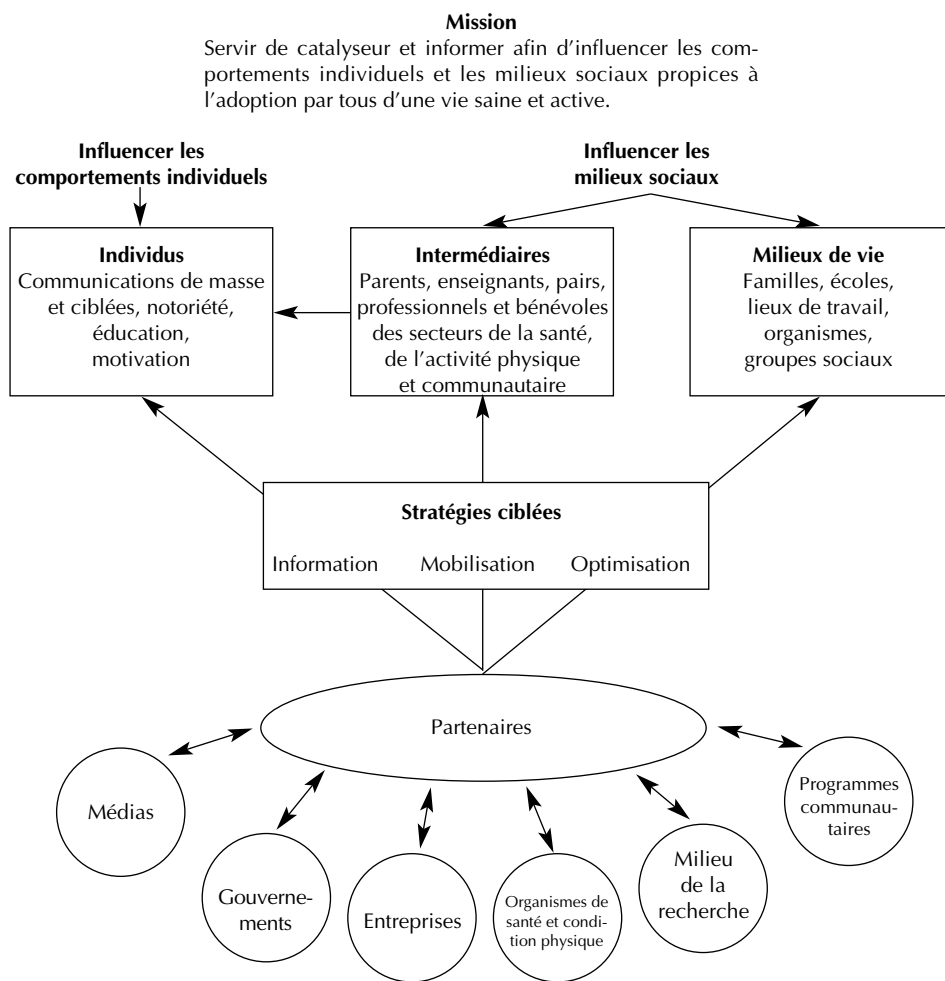

**Figure 1.** Cadre stratégique de ParticipACTION

McKerracher, très exigeant en matière de création, avait déjà rejeté plusieurs logos avant de finalement confier à un concepteur qu'il connaissait le mandat d'explorer de nouvelles avenues. Wolfgang Letzin a proposé du premier coup le désormais célèbre virevent bleu et rouge, dont il a d'ailleurs fait don au nouvel organisme. Ce symbole, qui suggérait le mouvement et pouvait être animé pour la télévision, correspondait exactement à ce que McKerracher cherchait. À l'image s'est ajoutée la signature institutionnelle, « Le mouvement canadien du bien-être physique », qui définissait parfaitement la mission du nouveau groupe. Tout au long de la première décennie, le logo, le nom, le message et le mouvement ont rapidement gagné en popularité. En 1978, 79 pour cent de la population canadienne connaissait ParticipACTION.<sup>7</sup> La signature institutionnelle n'était plus nécessaire.

#### *Le recours aux techniques de marketing et aux milieux de vie pour créer un mouvement*

Dès le départ, ParticipACTION a emprunté au marketing ses cinq P (produit, place, prix, promotion et positionnement), les combinant dans un mix marketing original. L'organisme a également eu recours à deux techniques de marketing fondamentales<sup>8</sup> : la stratégie de la pression (*push*) et la stratégie d'aspiration (*pull*). La stratégie de la pression visait les intermédiaires et les influenceurs, notamment les enseignants, les employeurs et les élus, qui contrôlaient les cadres de l'activité physique. La stratégie d'aspiration, par contre, ciblait directement la population par le biais de messages destinés à convaincre les gens qu'ils avaient besoin du produit de ParticipACTION et que son prix était juste. Une brochure publiée dans le milieu des années 1970 expliquait ainsi la philosophie de ParticipACTION :

- Tout le monde peut être en forme, pas seulement les athlètes ou les jeunes.
- Il y a d'immenses avantages à être en forme.
- La moitié du plaisir est dans le cheminement.
- Se tenir en forme peut devenir un mode de vie individuel, familial et même national.

Malgré ces emprunts au marketing commercial, ParticipACTION n'a jamais perdu de vue que tout changement de comportement commence par une idée, et non un produit. « Pour être efficace, le marketing social doit respecter son public cible, soutient Kisby. Les campagnes publicitaires condescendantes ou qui disent aux gens ce qu'ils *devraient* faire sont vouées à l'échec. Une campagne doit *illustrer* plutôt qu'*affirmer* qu'une idée est bonne et expliquer pourquoi il faut agir et comment. »

Par ailleurs, les dirigeants de l'organisme qui étaient passés par le YMCA savaient intuitivement que l'approche « milieu » permettait de rejoindre et de motiver aisément des publics cibles diversifiés. Saskatoon, ville d'origine de Kisby, devint donc la première ville-pilote de ParticipACTION, qui se prêta avec enthousiasme à l'évaluation de nombreux concepts communautaires innovateurs, notamment un défi inter-villes. L'article de Costas-Bradstreet analyse cet aspect plus à fond.

Grâce à des partenariats avec des enseignants, des cadres scolaires et l'Association canadienne pour la santé, l'éducation physique, le loisir et la danse (ACSEPLD), ParticipACTION a pu, par l'entremise des écoles, transmettre son message aux enfants, aux enseignants et aux parents. Ironiquement, plusieurs universitaires, d'abord sceptiques sur les méthodes de ParticipACTION, sont devenus par la suite ses plus fervents partisans. La publication d'une brochure sur les défis de la promotion de l'activité physique chez les jeunes, en collaboration avec l'ACSEPLD, a scellé les liens avec le milieu universitaire en amenant sur la place publique la préoccupation des chercheurs à l'égard de la mauvaise condition physique des enfants.

À la fin des années 1970 et au début des années 1980, l'activité physique en milieu de travail est également devenue un enjeu majeur pour les gouvernements et

ParticipACTION. De nombreuses entreprises, dont Canadien National, Téléglobe Canada, MacMillan Bloedel, Wood Gundy, Banque TD et Sun Life, ont participé à la campagne d'information *Faits et gestes* de ParticipACTION, qui a permis de rejoindre quelque 100 000 employés et leur famille. Des suppléments insérés dans la revue *enRoute* et le *Financial Post* incitaient les cadres à « trouver le temps » de faire de l'exercice et de « donner le temps » à leurs employés d'en faire. Au début des années 1980, ParticipACTION a commencé à distribuer aux employés de plus de 2 000 entreprises des dépliants traitant de divers aspects de la santé. Ce programme s'est poursuivi jusqu'en 1999. (Vous trouverez dans l'article de Costas-Bradstreet<sup>9</sup> d'autres exemples d'initiatives en milieu de travail.)

À la fin de la première décennie, ParticipACTION avait plus qu'atteint ses objectifs de notoriété et de changements de comportement. L'organisme avait réussi à se doter d'une image et avait été l'un des principaux moteurs de la progression du mouvement en faveur de l'activité physique. ParticipACTION et ses partenaires avaient réalisé une campagne de publicité stimulante, une émission spéciale de télévision nationale, 100 *ParticiParcs*, des affiches sur l'exercice conçues par des artistes parmi les plus réputés au pays, de même que des centaines d'autres promotions. Le groupe avait réussi à gagner le cœur et la confiance de nombreux enseignants et employeurs. La vision de ParticipACTION était devenue réalité grâce aux efforts d'un personnel de moins de dix personnes qui ont sillonné le pays au pas de course pour diffuser les messages.

### Les années d'intense activité du mouvement

Dans les années 1980 et 1990, l'activité physique et la promotion de la santé ont gagné beaucoup de terrain. Au cours des années 1980, le mouvement a continué à progresser, ciblant les jeunes, les aînés, les personnes ayant un handicap, les femmes et les professionnels et bénévoles du secteur de l'activité physique. En 1986, l'ACSP a organisé, en collaboration avec Santé Canada et l'Organisation mondiale de la santé, la première conférence internationale sur la promotion de la santé.

**TABLEAU I**

#### Diffusion dans les médias de masse des messages d'intérêt public de ParticipACTION

350 chaînes de télévision et câblodistributeurs  
 580 stations de radio\*  
 110 quotidiens  
 950 hebdomadaires  
 1 100 magazines commerciaux et spécialisés  
 1 100 publications et bulletins d'entreprise

\* en raison de la baisse du financement, aucune annonce radio n'a été réalisée après 1995

**TABLEAU II**

#### Principales sources de financement (en dollars constants de 1971)\*

| Année     | Condition physique/Santé Canada | Autres commanditaires |
|-----------|---------------------------------|-----------------------|
| 1971-1972 | 262 000 \$                      | —                     |
| 1980-1981 | 302 772 \$                      | 272 495 \$            |
| 1990-1991 | 266 384 \$                      | 440 334 \$            |
| 1999-2000 | 122 044 \$                      | 101 371 \$            |

\* Calculs effectués au moyen de la feuille de calcul de l'inflation de la Banque du Canada à partir de données de l'indice des prix à la consommation

**TABLEAU III**

#### Exemples de soutien financier privé

| Montant      | Entreprise                    | Type d'initiative                                          |
|--------------|-------------------------------|------------------------------------------------------------|
| 3 500 000 \$ | CrownVie (10 ans)             | Défi d'activité réunissant 500 localités                   |
| 1 500 000 \$ | Astra Pharma (3 ans)          | Matériel pour les leaders communautaires                   |
| 1 000 000 \$ | Air Canada, CN, Banque Royale | Achat de matériel d'information pour le personnel          |
| 1 000 000 \$ | CrownVie (5 ans)              | Bulletin à 1 000 milieux de travail                        |
| 750 000 \$   | Astra Pharma (3 ans)          | Messages publicitaires <i>Défi santé</i>                   |
| 350 000 \$   | Sun Life Assurance            | Sentiers sportifs et éducation locale                      |
| 300 000 \$   | Hoffman-La Roche              | Campagne d'information sur l'obésité                       |
| 275 000 \$   | H.J. Heinz                    | Éducation du public par le biais des médecins de famille   |
| 200 000 \$   | Merck Frosst                  | Ressources à l'intention des intervenants auprès des aînés |

**TABLEAU IV**

#### Ententes gouvernementales de mobilisation communautaire

|                     |                                                                            |                                                                                                        |
|---------------------|----------------------------------------------------------------------------|--------------------------------------------------------------------------------------------------------|
| 6 500 000 \$ (1992) | Programme Canada 125<br>Gouvernement du Canada                             | 50 animateurs communautaires,<br>1,1 million de bénévoles, 21 000 activités locales recensées          |
| 5 000 000 \$ (2000) | Relais 2000 du Sentier transcanadien (Bureau du Canada pour le millénaire) | 30 animateurs communautaires, plus de 800 localités, des dizaines de milliers d'intervenants bénévoles |
| 1 500 000 \$ (1988) | Relais de la flamme olympique 1988<br>Gouvernement du Canada               | 10 animateurs communautaires ont mobilisé 1 600 localités dans le cadre du Relais Petro-Canada         |

C'est à cette occasion qu'a été élaborée la *Charte d'Ottawa pour la promotion de la santé*.<sup>10</sup> C'est aussi dans le cadre de cette conférence que Santé Canada a dévoilé son programme *La santé pour tous : Plan d'ensemble pour la promotion de la santé*,<sup>11</sup> qui a mené à la naissance du concept de vie

active. En 1986, le *Sommet sur la condition physique* a contribué à faire évoluer l'exercice vers un concept plus doux de « vie active ». D'ailleurs, dix ans plus tard, le rapport du *Surgeon General* sur l'activité physique et la santé faisait état de preuves à l'appui de l'approche en douceur. Durant

**Campagnes radio**

Au cours des premières années, Keith McKerracher et son personnel ont rencontré plus de 50 stations de radio pour savoir quels genres d'annonces seraient les plus susceptibles d'être diffusées. Après avoir établi une stratégie pour répondre aux besoins des stations, ils ont confié à Listen Audio et à d'autres agences, dont FOUG, le mandat de produire des annonces humoristiques qui plairaient aux dirigeants des stations de radio et au public. En voici un exemple, signé FOUG :

- Femme (impatiente) : Mets de la cire verte.
- Homme (intransigeant) : De la bleue.
- Femme : François, pose tes skis.
- Homme : Bleue, bleue, bleue.
- Femme : Arrête. Le partage en ski de fond, c'est un art. Cette neige-là, c'est de la poudreuse, alors on met de la...
- Homme : Bleue.
- Femme : Verte.
- Homme : Il fait moins 5 degrés.
- Femme : Quand il fait moins 5 degrés, on met de la bleue.
- Homme : Quelle piste on prend ?
- Femme : La jaune.
- VHC : Ah non, pas la jaune, la rouge !
- Femme : Faites du ski de fond. Ça donne des couleurs.
- VHC : ParticipACTION. À vous de jouer.

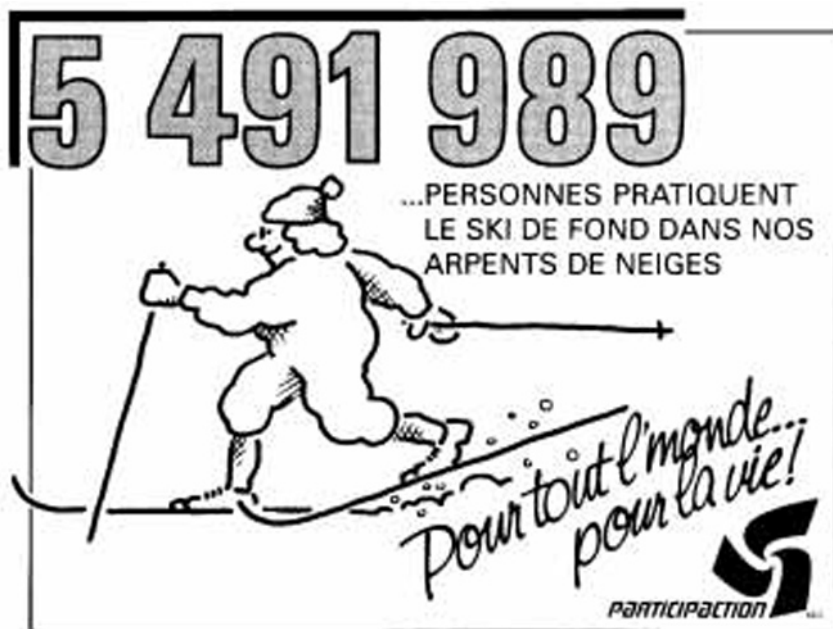

cette période, le Canada a été l'hôte de deux conférences internationales sur l'activité physique, la condition physique et la santé (1988 et 1992). Santé Canada a également publié des lignes directrices sur le poids-santé et une série de *Guides d'activité physique pour une vie active saine*.

ParticipACTION a appuyé le mouvement de vie active et son leadership original en optimisant son soutien, en créant des partenariats, en réalisant des messages motivants et en stimulant l'engagement local. Sa mission était claire, et il s'appuyait sur des stratégies aux cibles multiples (voir la Figure 1 à la page S9).

Cependant, l'évolution du paysage média, la concurrence des enjeux prioritaires et la réduction de la participation gouvernementale aux messages d'intérêt public ont forcé l'organisme à mettre fin à ses activités en janvier 2001.

**Soutien et partenariats**

Dès les premiers jours, ParticipACTION a travaillé ferme pour que son message reçoive un soutien optimal. Au cours des vingt premières années, son personnel a parcouru le pays pour défendre sa cause auprès des stations de télévision et de radio ainsi que des journaux. Cette approche

**Y penser, c'est pas assez. Faites-le !**

Cette campagne a été réalisée des années avant le célèbre « Just do it » de Nike. Bien que la théorie sur les étapes de changement de comportement n'avait pas encore été développée, le slogan s'adressait à ceux qui envisageaient de passer à l'action.

**Y PENSER, C'EST PAS ASSEZ  
-FAITES-LE!**

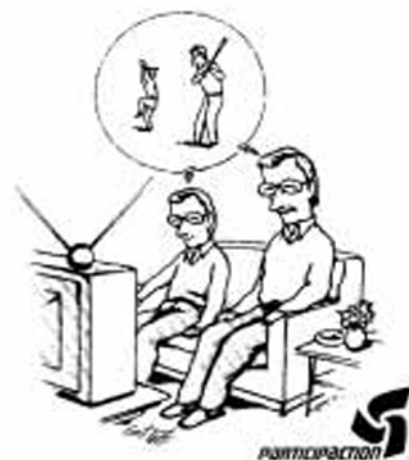

personnalisée et la qualité de sa publicité ont fait en sorte que ParticipACTION n'a jamais eu à déboursier un sou en placement média. Au début des années 1990, la valeur de ce placement a atteint les 15 millions de dollars par année (sans compter l'aide reçue en nature et la visibilité hors-médias). En près de 30 ans, l'organisme a ainsi bénéficié d'un soutien média total évalué à 280 millions de dollars.

Au fil des ans, ParticipACTION a entretenu des relations privilégiées avec une foule de médias de masse (Tableau I). « Le succès de ParticipACTION reposait sur la bonne volonté d'une variété de médias », soutient François Lagarde, expert-conseil en marketing social et ancien vice-président de l'organisme.

Cette imposante visibilité média a contribué à intéresser des partenaires commerciaux qui, ensemble, ont apporté à ParticipACTION un soutien égal et parfois supérieur à l'aide gouvernementale (Tableaux II et III). Elle a également contribué à la création d'un réseau de supporteurs locaux de tous âges qui ont permis à des millions de personnes d'avoir accès à des installations et à des programmes d'activité physique.

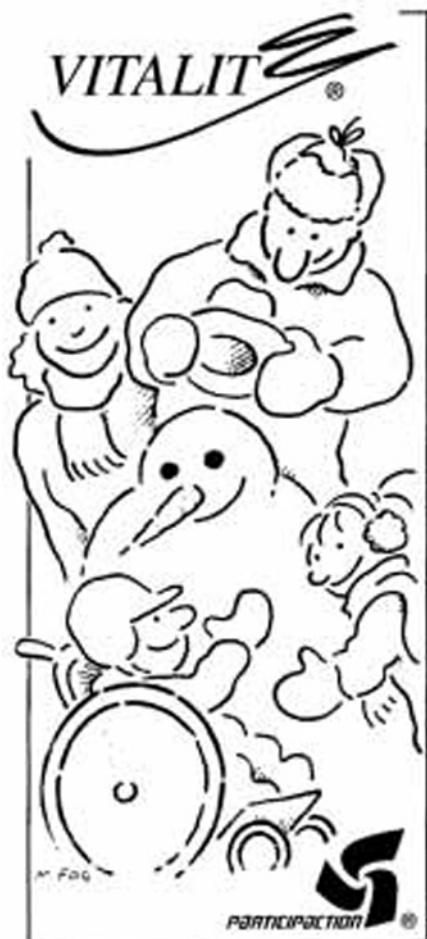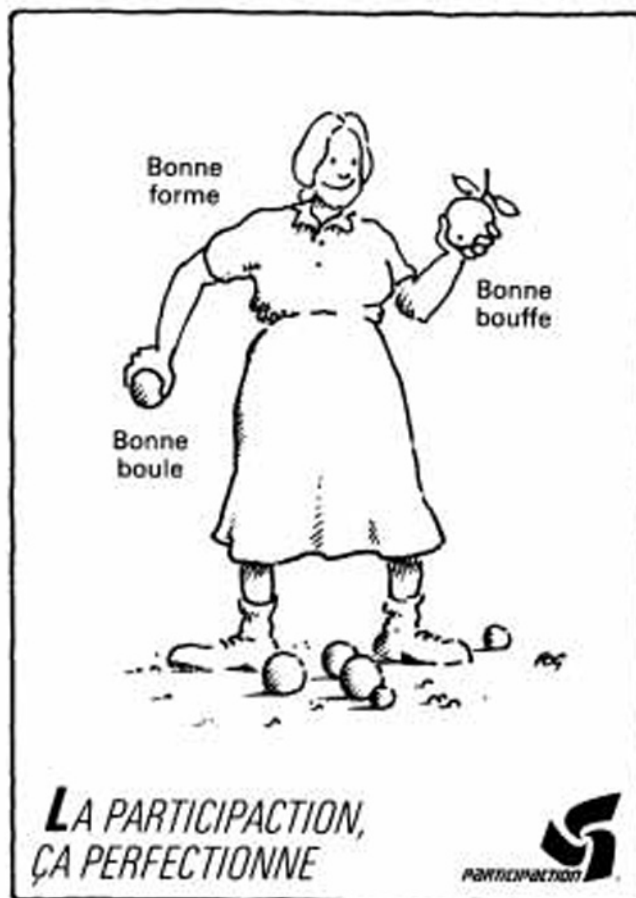

Le gouvernement fédéral a assuré le financement de base durant 29 ans, un soutien qui a cependant décliné tout au long des années 1990 (Tableau II). Les gouvernements provinciaux ont également financé plusieurs initiatives. D'autres partenaires des secteurs professionnels et sans but lucratif, comme la Fondation canadienne des maladies du cœur et l'Association canadienne de santé publique, ont contribué à de nombreux projets en offrant leur expertise, l'accès à des personnes d'influence et du soutien en nature dont la valeur s'est révélée inestimable. L'article de Costas-Bradstreet traite de campagnes de communications et de projets de mobilisation communautaire réalisés en partenariat avec les secteurs privé et sans but lucratif.<sup>9</sup> ParticipACTION a également pu compter sur l'appui d'autres ministères fédéraux pour des activités de mobilisation (Tableau IV).

**Campagnes publicitaires de motivation**  
Les messages publicitaires de ParticipACTION s'inscrivaient dans un modèle où se succédaient notoriété (le Suédois de 60

#### Campagnes associant l'activité physique et l'alimentation

- Vitalité
- La participACTION, ça perfectionne !
- Défi santé : notre responsabilité à tous !
- Une vie active saine pour les aînés

ans), éducation (la campagne *15 minutes trois fois par semaine*), motivation (la campagne *Faites-le !*), solutions (la campagne *Première promenade*) et renforcement (la campagne *Pour tout l'monde... pour la vie !*). Certaines campagnes ont fait appel à des techniques astucieuses pour convaincre la population qu'il est facile de surmonter certains obstacles, notamment le manque de temps. Ainsi, l'une des annonces se résumait en une suite de petites cases représentant les segments de 15 minutes d'une semaine. Trois de ces segments étaient entourés, illustrant le peu de temps qu'il suffisait de consacrer à l'activité physique dans une semaine pour être actif.

Au cours des années qui ont suivi, on a plutôt tenté de démontrer la façon que privilégiaient des personnes et des groupes pour rester actifs. La campagne *Défi santé* :

*notre responsabilité à tous !* (réalisée grâce au soutien de Astra Pharma Inc., aujourd'hui AstraZeneca) insistait sur le fait que tout le monde pouvait améliorer son état de santé en étant plus actif. Elle mettait en vedette des gens et des collectivités, comme un groupe de femmes qui luttait contre l'ostéoporose en menant une vie active ou une petite entreprise qui avait mis en place un programme d'exercice destiné à réduire le stress au sein de son personnel.

ParticipACTION n'a jamais endossé le principe qu'il faut souffrir pour obtenir des résultats. Ses conseils, comme la *Première promenade*, étaient pratiques et simples à intégrer au quotidien de chacun. D'autres campagnes ont également remporté un grand succès :

- *En forme, maintenant... et comment !*
- *Encore un qui fait (de la natation, du jogging, etc.)*

- *Y penser, c'est pas assez. Faites-le !*
- *Pour tout l'monde... pour la vie !*
- *À vous de jouer.*
- *Petit train va loin.*

Tout au long des années 1980 et 1990, les campagnes publicitaires de ParticipACTION ont suivi les nouvelles découvertes scientifiques sur les bienfaits de l'exercice sur la santé. Ainsi, les mots ont évolué, passant de « condition physique » à « activité physique » pour en arriver à « vie active ». En 1998, lorsque Santé Canada a publié un *Guide d'activité physique canadien pour une vie active saine*, ParticipACTION a lancé une campagne télévision et imprimée pour promouvoir le guide.

Avec le temps, ParticipACTION a lié de plus en plus ses messages à d'autres messages sur la santé : santé du cœur, maintien du poids et saine alimentation. Les défenseurs de cette approche intégrée à la vie active soulignent les limites de s'attaquer de façon isolée à des facteurs de risque et à des maladies, sans oublier le problème de duplication des messages. Selon eux, les efforts ciblant des facteurs multirisques (mauvaise alimentation ou sédentarité, par exemple) pour contrer des maladies précises ou des familles de maladies ont donné de meilleurs résultats.<sup>12</sup> Toutefois, la documentation sur le bien-fondé de combiner des messages comporte des opinions divergentes.

Selon Fridinger et Kirby,<sup>13</sup> les responsables de campagnes et de programmes dont le message associe l'activité physique et la saine alimentation doivent être conscients que de nombreux experts dans ce domaine sont d'avis qu'il existe des différences dans le comportement et le profil des publics ciblés dans chacun des cas. De plus, certains experts considèrent que les facteurs du mix marketing (produit, prix, place, promotion et positionnement) de l'activité physique et de la saine alimentation sont trop distincts pour que leur association ait un effet déterminant sur le comportement des consommateurs.<sup>13</sup>

*Vitalité : une campagne en avance sur son temps*

En 1988, Santé Canada a publié *L'approche intégrée : Plan d'action*, un

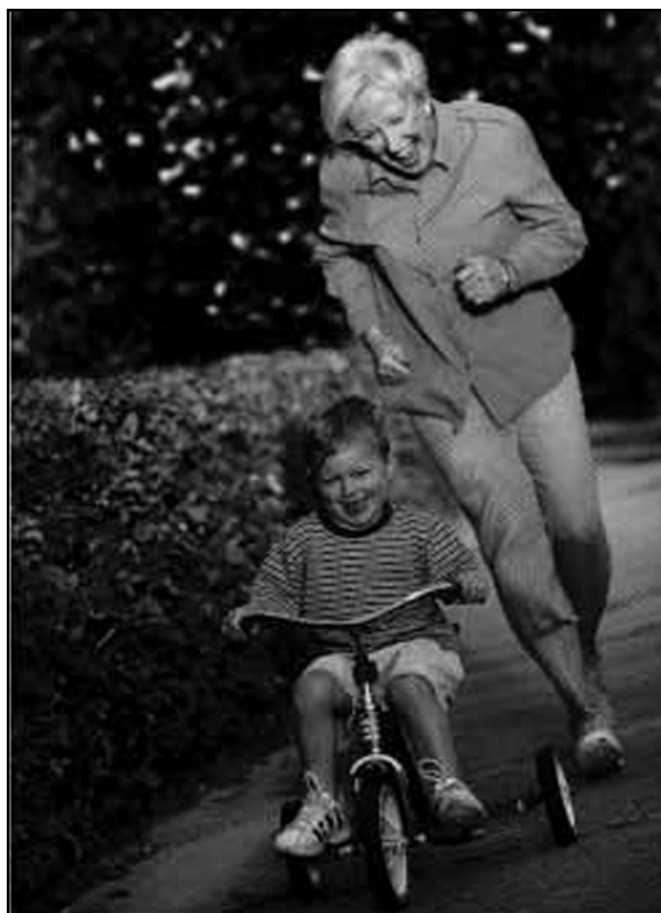

## ParticipACTION a incité les Canadiens à être actifs pendant plus de 30 ans.

ParticipACTION a été créée en 1971 pour encourager les Canadiens à adopter un mode de vie actif. Ses techniques ont connu un tel succès que le modèle canadien est maintenant appliqué dans quelque 25 pays du monde.

La Financière Sun Life est fière d'avoir été le partenaire de ParticipACTION dès ses débuts. Nous sommes heureux que le fait d'avoir parrainé ParticipACTION pendant ses premières années d'existence ait incité de nombreuses autres entreprises à s'associer à l'organisme et à appuyer ses différentes initiatives.

Félicitations à ParticipACTION, qui a encouragé les Canadiens à faire de l'activité physique... et à demeurer en santé.

Financière   
Sun Life



document qui recommandait un cadre pour la promotion du poids-santé. Les objectifs du programme étaient :

- d'aider la population à aborder de façon intégrée la saine alimentation, l'activité physique pour le plaisir (désigné plus tard sous le vocable de vie active) et l'image de soi et de son corps ;
- de créer un milieu propice à l'adoption de cette approche intégrée.

Le public cible initial était les adultes de 25 à 44 ans, ayant de 9 à 13 années de scolarité. De 1991 à 1995, Santé Canada et Condition physique Canada ont dépensé en moyenne 650 000 dollars par année à ce programme, dont 74 pour cent consacrés au marketing social et 26 pour cent à l'action communautaire et à la formation professionnelle. Le duo a produit quelques pièces promotionnelles et a confié à ParticipACTION le mandat d'élaborer un concept marketing et une vaste campagne publicitaire.

Le défi était grand, puisqu'il fallait trouver un nom et une image à une campagne intégrant trois messages complexes. La recommandation de ParticipACTION, *Vitalité*, s'est révélée un coup de génie. Sur le plan de l'image, puisque les gens l'associaient à « se sentir bien ». Et sur le plan graphique puisque le logo stylisé permettait de lire à la fois *Vitalité* à la française et *Vitality* à l'anglaise, répondant ainsi aux impératifs de bilinguisme. La campagne combinait des publicités d'intérêt public imprimées, radio et télévision, auxquelles s'ajoutaient des pièces et événements de formation professionnelle et d'action communautaire.

Le programme a été interrompu à la fin des années 1990 pour diverses raisons, notamment le décès de deux de ses plus fervents défenseurs au sein de Santé Canada et de Condition physique Canada. Des critiques commencèrent à fuser, affirmant que l'on consacrait trop au marketing social et que les évaluations ne démontraient pas de changements de comportement au sein de la population à l'égard de l'alimentation, de l'activité

physique et de l'image de soi et de son corps.

En 2003, Santé Canada a procédé à une évaluation poussée du programme *Vitalité* et des leçons à en tirer.<sup>14</sup> Parmi les raisons de l'abandon de *Vitalité* et les leçons tirées, on note :

- obtenir un engagement à long terme des hautes instances gouvernementales ;
- allouer suffisamment de ressources pour créer un environnement propice ;
- établir dès le début un cadre d'évaluation qui inclut des objectifs pertinents et mesurables ;
- maintenir les activités marketing suffisamment longtemps pour ancrer l'identité du programme et de ses messages.

Ironiquement, en 2004, face à l'augmentation alarmante de l'obésité et de ses liens avec le diabète et autres maladies chroniques, le poids-santé est redevenu un enjeu majeur. Des leaders des milieux gouvernemental et sans but lucratif, en quête d'un nouveau concept marketing, ne peuvent s'empêcher de revenir à « l'approche intégrée » de *Vitalité* comme moyen de promouvoir le poids-santé sans exacerber l'obsession du poids ou rebuter les publics cibles.

### 2001 : la fin

Ne disposant plus des ressources de base suffisantes pour soutenir sa campagne publicitaire maîtresse, ParticipACTION a cessé de produire de nouvelles annonces en 1999. À la fin de l'an 2000, son conseil a décidé de mettre fin à ses activités. Le gouvernement est resté sourd aux personnes, aux groupes et aux médias qui réclamaient le rétablissement d'un financement adéquat.

L'article de Bauman, Madill, Craig et Salmon<sup>1</sup> démontre que la notoriété de ParticipACTION est passée de 79 % en 1979 à 90 % en 1992. En 2002, un an après sa fermeture, un sondage Ekos Research révélait que 85 % des Canadiens et Canadiennes avaient entendu parler de ParticipACTION. Dans le dernier article

de ce document, Rootman et Edwards<sup>15</sup> traitent de l'héritage de ParticipACTION et de l'avenir des communications dans le secteur de la santé, en insistant sur la promotion de l'activité physique.

### RÉFÉRENCES

1. Bauman A, Madill J, Craig CL, Salmon A. ParticipACTION a-t-il eu les effets visés ? *Rev can santé publique* 2004;95(Suppl. 2):S15-S21.
2. Définition inspirée de Rogers EM, et Storey JD. Communication campaigns. Dans : Charles R. Berger and Steven H. Chaffee (Eds.), *Handbook of Communication Science*. Newbury Park, CA: Sage, 1988, et du travail de The Health Communication Unit, Université de Toronto, Centre for Health Promotion (www.thcu.ca).
3. Kotler P, Zaltman G. Social marketing. *J Marketing* 1971;35:3-12.
4. Kahn E, Ramsey L, Browson R, Heath G, Howze E, Powell K, et al. Task Force on Community Preventive Services (2002). The effectiveness of interventions to increase physical activity: A systematic review. *Am J Prev Med* 2002;22(4S):73-104.
5. Lalonde M. *Nouvelle perspective de la santé des Canadiens*. Ottawa (Ontario) : Ministère de la Santé nationale et du Bien-être social, 1974.
6. Lagarde F. Le défi du bilinguisme : des campagnes réussies dans les deux langues. *Rev can santé publique* 2004;95(Suppl. 2):S32-S34.
7. Enquête du Centre de Recherches Contemporaines, 1998.
8. Mintz J, Steele M. Marketing de l'information sur la santé. *Promotion de la santé* Automne 1992.
9. Costas-Bradstreet C. Mobilisation, éducation et leadership : des stratégies de diffusion efficaces. *Rev can santé publique* 2004;95(Suppl. 2):S27-S31.
10. Organisation mondiale de la santé. *Charte d'Ottawa pour la promotion de la santé*, 1986. Disponible à [www.hc-sc.gc.ca/hppb/phdd/docs/charter](http://www.hc-sc.gc.ca/hppb/phdd/docs/charter).
11. Ministère de la Santé nationale et du Bien-être social. *La santé pour tous : Plan d'ensemble pour la promotion de la santé*, 1986. Disponible à [http://www.hc-sc.gc.ca/francais/soins/sante\\_tous.htm](http://www.hc-sc.gc.ca/francais/soins/sante_tous.htm).
12. Lyons R, Langille L. *Mode de vie sain : Rehausser l'efficacité des approches axées sur le mode de vie pour améliorer la santé*. Document réalisé pour le compte du Comité consultatif sur la santé de la population, 2000.
13. Fridinger F, Kirby S. The 'doublemint' factor: Issues and challenges in marketing nutrition and physical activity behaviors in one program. *Social Marketing Quarterly* 2002;8(4):40-52.
14. Martineau C. *VITALITY ... Where Do We Go From Here?* Document interne réalisé pour le compte du Bureau de la politique et de la promotion de la nutrition, Santé Canada, 2003.
15. Rootman I, Edwards P. L'héritage de ParticipACTION et l'avenir de la promotion de l'activité physique au Canada. *Rev can santé publique* 2004;95(Suppl. 2):S40-S46.
